# Supplementary figures and images for: Creation of new guest accessible space under gas pressure in a flexible MOF: multidimensional insight through combination of in situ techniques
Source: Royal Society of Chemistry journal article supplement (doi:10.1039/c6cc06709c), 2016-01-01

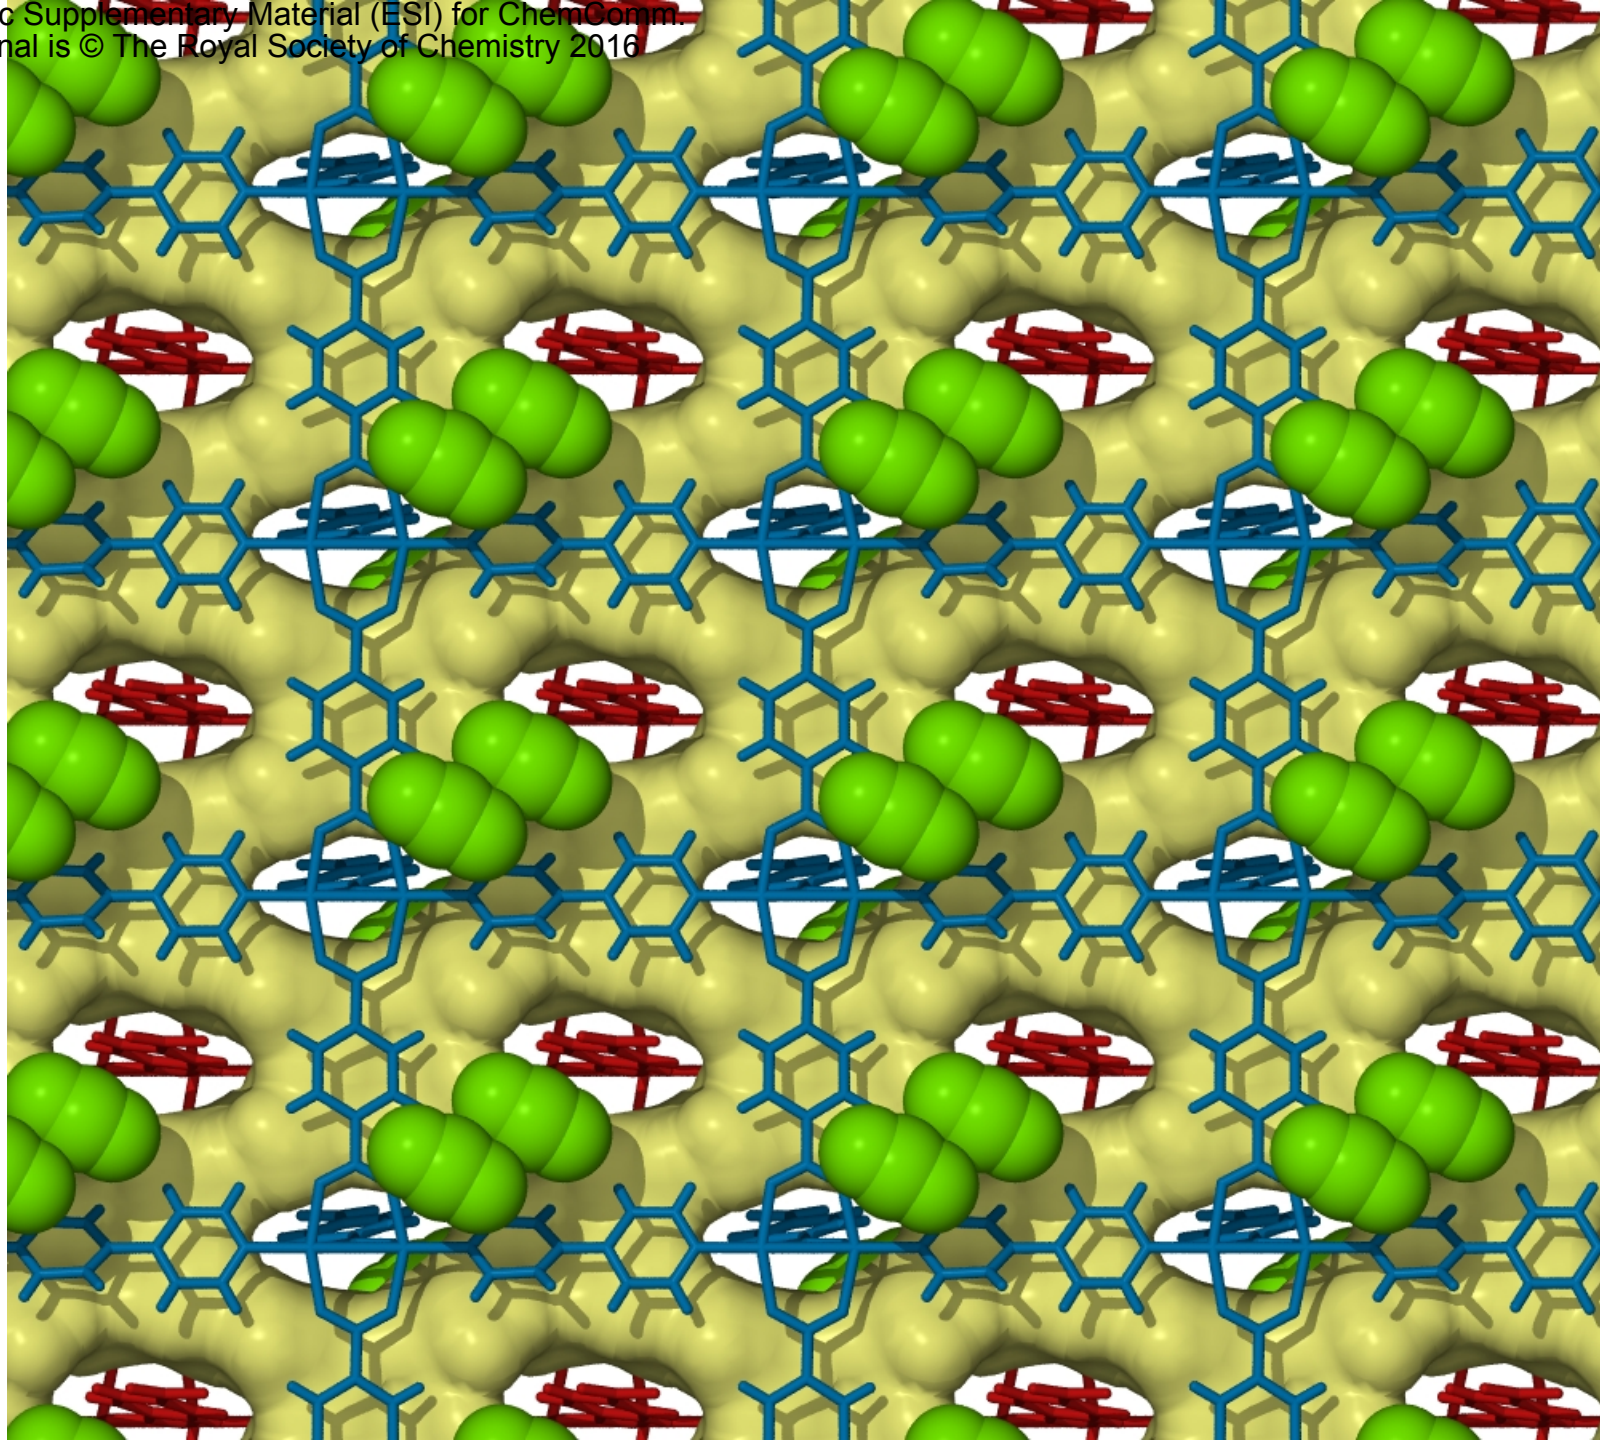

Supplement: c6cc06709c1.pdf [file c6cc06709c1.pdf]
